# Supplementary material for: Indirect photodegradation of ofloxacin in simulated seawater: Important roles of DOM and environmental factors
Source: Frontiers journal article supplement (doi:10.3389/fmars.2023.1132216), 2023-03-01
Supplement: Data_Sheet_1.docx [file Data_Sheet_1.docx]

**Indirect photodegradation of ofloxacin in simulated seawater: important roles of DOM and environmental factors**

Shukai Liu a, b, Zhengguo Cui b, Ying Bai b*, Dongsheng Ding b, Junshuang Yin b, Rongguo Su a*, Keming Qu b

*a Laboratory of Marine Chemistry Theory and Technology, Ministry of Education, Ocean University of China, Qingdao 266100, China*

*b* *Key Laboratory of Sustainable Development of Marine Fisheries, Ministry of Agriculture and Rural Affairs, Laboratory for Marine Fisheries Science and Food Production Processes, Yellow Sea Fisheries Research Institute, Chinese Academy of Fishery Sciences, Qingdao 266071, China*

**Table S1**

Optimized parameters of HPLC

| Compounds | Mobile phase  composition (v: v) | Detection wavelength (nm) | Flow rate (mL/min) | Injection volume (μL) |
| --- | --- | --- | --- | --- |
| OFX | Acetonitrile: 0.1% H3PO4 (40.:60) | 290 nm | 1.0 | 20.0 |
| FFA | Acetonitrile: 0.08% H3PO4 (10:90) | 216 nm | 1.0 | 20.0 |
| TA | Methanol: 0.08% H3PO4 (50:50) | 254 nm | 1.0 | 20.0 |
| HOTA | Methanol: 0.08% H3PO4 (50:50) | λex=315 nm λem=425 nm | 1.0 | 20.0 |
| SA | Sodium acetate buffer (pH 4.75): Acetonitrile (85:15) | 254 nm | 1.0 | 20.0 |

**Table S2**

The proportion of indirect photodegradation in DOM solutions (10 mg C L-1)

|  | concentration  (mg C L-1) | *f* | *k*obs | k(non-DOM)*ƒ | *k*ind | IP% |
| --- | --- | --- | --- | --- | --- | --- |
| SRHA | 2 | 0.901 | 0.012 | 0.009 | 0.004 | 0.305 |
|  | 5 | 0.770 | 0.022 | 0.007 | 0.015 | 0.668 |
|  | 10 | 0.522 | 0.025 | 0.005 | 0.020 | 0.801 |
| SRFA | 2 | 0.924 | 0.014 | 0.009 | 0.005 | 0.356 |
|  | 5 | 0.842 | 0.014 | 0.008 | 0.006 | 0.429 |
|  | 10 | 0.624 | 0.016 | 0.006 | 0.010 | 0.627 |
| JKHA | 2 | 0.754 | 0.015 | 0.007 | 0.008 | 0.525 |
|  | 5 | 0.526 | 0.037 | 0.005 | 0.032 | 0.865 |
|  | 10 | 0.292 | 0.060 | 0.003 | 0.058 | 0.954 |

**Table S3**

The contribution rate of RIs on indirect photodegradation of OFX

| RIs | 1O2 | ∙OH | 3DOM* |
| --- | --- | --- | --- |
| OFX | 34.7% | 11.5% | 44.8% |

**Table S4**

Characteristics of the four components identified in the present study compared with those previously identified.

|  | Ex/Em/nm | Description and probable source | Comparison with other studies |
| --- | --- | --- | --- |
| C1 | 420/500 | terrestrial humic-like materials | (Yamashita et al., 2015)  (Cawley et al., 2012) |
| C2 | 370/460 | terrestrial humic-like materials | (Zhang et al., 2009) |
| C3 | 460/520 | soil fulvic acid | (Lochmueller and Saavedra, 1986) |
| C4 | 320/440 | visible humic-like | (Chen et al., 2017)  (Coble et al., 1998) |

**Table S5**

The fluorescence intensities of PARAFAC-identified components.

| DOM | Concentration (mg C/L) | C1 fluorescence intensity (QSU) | |  | C2 fluorescence intensity (QSU) | |  | C3 fluorescence intensity (QSU) | |  | C4 fluorescence intensity (QSU) | |  | Total fluorescence intensity (QSU) | |  | HIX |  | SUVA254 |
| --- | --- | --- | --- | --- | --- | --- | --- | --- | --- | --- | --- | --- | --- | --- | --- | --- | --- | --- | --- |
|  |  | before | after |  | before | after |  | before | after |  | before | after |  | before | after |  |
| SAHA | 2 | 0.50 | 0.44 |  | 0.69 | 0.64 |  | 0.37 | 0.34 |  | 0.45 | 0.67 |  | 2.01 | 2.09 |  | 8.45 |  | 6.73 |
|  | 5 | 1.12 | 0.86 |  | 1.49 | 1.27 |  | 0.85 | 0.64 |  | 0.83 | 1.03 |  | 4.29 | 3.80 |  | 14.09 |  | 6.86 |
|  | 10 | 2.12 | 1.45 |  | 2.65 | 2.23 |  | 1.62 | 0.97 |  | 1.17 | 1.46 |  | 7.56 | 6.11 |  | 23.94 |  | 10.70 |
| SRFA | 2 | 0.74 | 0.40 |  | 1.50 | 0.74 |  | 0.31 | 0.26 |  | 1.06 | 0.80 |  | 3.60 | 2.20 |  | 9.64 |  | 5.63 |
|  | 5 | 1.47 | 0.73 |  | 2.80 | 1.36 |  | 0.67 | 0.44 |  | 1.85 | 1.33 |  | 6.80 | 3.87 |  | 17.72 |  | 5.50 |
|  | 10 | 2.74 | 1.30 |  | 4.97 | 2.51 |  | 1.30 | 0.75 |  | 2.88 | 2.08 |  | 11.89 | 6.64 |  | 27.18 |  | 9.40 |
| JKHA | 2 | 3.38 | 2.12 |  | 2.34 | 1.33 |  | 3.57 | 2.23 |  | 1.92 | 2.13 |  | 11.21 | 7.81 |  | 22.06 |  | 14.56 |
|  | 5 | 6.81 | 4.21 |  | 4.71 | 2.82 |  | 7.24 | 3.85 |  | 3.53 | 3.53 |  | 22.28 | 14.41 |  | 49.94 |  | 14.39 |
|  | 10 | 10.99 | 8.13 |  | 7.53 | 5.28 |  | 11.96 | 8.14 |  | 5.02 | 4.26 |  | 35.50 | 25.81 |  | 96.12 |  | 18.09 |

**Table S6**

Steady-state concentrations of ∙OH, 1O2, and 3DOM* in different DOM solutions.

| Type of DOM | | DOC (mg C/L) | | [∙OH]ss (10-17 M) | | [1O2]ss (10-13 M) |  | [3DOM*]ss (10-14 M) |
| --- | --- | --- | --- | --- | --- | --- | --- | --- |
| SRHA | 2 | | 0.66±0.03 | | 0.97±0.05 | |  | 0.46±0.02 |
|  | 5 | | 1.01±0.02 | | 1.60±0.03 | |  | 0.98±0.01 |
|  | 10 | | 1.49±0.04 | | 3.2±0.03 | |  | 1.57±0.01 |
| SAFA | 2 | | 0.54±0.02 | | 0.95±0.03 | |  | 0.52±0.01 |
|  | 5 | | 0.97±0.01 | | 1.56±0.03 | |  | 1.02±0.01 |
|  | 10 | | 1.47±0.02 | | 2.44±0.04 | |  | 1.86±0.02 |
| JKHA | 2 | | 3.08±0.11 | | 1.60±0.08 | |  | 2.42±0.01 |
|  | 5 | | 5.87±0.17 | | 2.37±0.11 | |  | 4.89±0.01 |
|  | 10 | | 7.56±0.23 | | 4.42±0.18 | |  | 6.78±0.03 |

b

a

**Figure. S1.** (a)The concentrations of OFX under light and dark conditions; (b) UV–Vis absorption spectra of OFX

**Figure. S2.** RDA of fluorescence components, FI, HIX, SUVA254 and HIX with RIs, *kind*.
